# Supplementary material for: Hierarchical TiO2photonic crystal spheres prepared by spray drying for highly efficient photocatalysis
Source: Royal Society of Chemistry journal article supplement (doi:10.1039/c2ta00060a), 2012-10-02
Supplement: c2ta00060a.pdf [file c2ta00060a.pdf]

# Electronic Supplementary Information

## Hierarchical TiO<sub>2</sub> Photonic Crystal Spheres Prepared by Spray Drying for Highly Efficient Photocatalysis

Qiang Yang, Mingzhu Li,\* Jian Liu , Weizhi Shen, Changqing Ye, Xiaodi Shi, Lei Jiang, and Yanlin Song,\*

Beijing National Laboratory for Molecular Sciences (BNLMS), Key Lab of Organic Solids, Laboratory of New Materials, Institute of Chemistry, Chinese Academy of Sciences, Beijing, 100190, China.

E-mail: ylsong@iccas.ac.cn; mingzhu@iccas.ac.cn

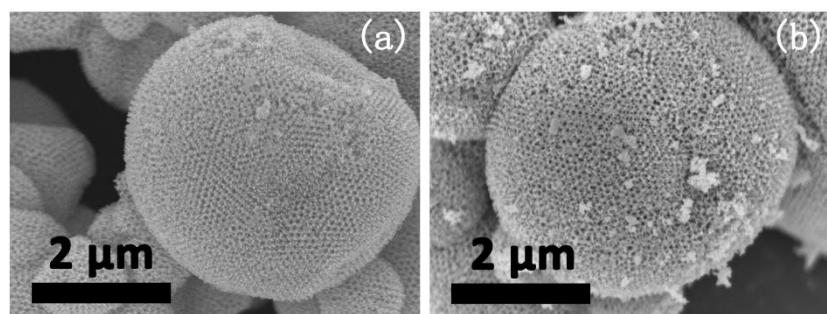

**Fig. 1S** SEM images of i-TiO<sub>2</sub>-PC spheres of the control sample before (a) and after (b) photodegradation experiment. During the photocatalytic process, the structure remained stable. The small scraps on the surface of i-TiO<sub>2</sub>-PC spheres after the process may result from destruction of a few spheres with cracks.
